# Supplementary material for: Z-DNA as a Tool for Nuclease-Free DNA Methyltransferase Assay
Source: MDPI journal article supplement (doi:10.3390/ijms222111990), 2021-11-05
Supplement: s1 [file s1]

## Supporting Information

### Z-DNA as a tool for nuclease-free DNA methyltransferase assay

Sook Ho Kim<sup>1,2,3,†</sup>, Hae Jun Jung<sup>1,2,†</sup>, Seok-Cheol Hong<sup>1,2,\*</sup>

<sup>1</sup>Center for Molecular Spectroscopy and Dynamics, Institute for Basic Science, Seoul 02841, Korea.

<sup>2</sup>Department of Physics, Korea University, Seoul 02841, Korea.

<sup>3</sup>GRI-TPC International Research Center, Sejong University, Seoul 05006, Korea.

#### Corresponding Author

\*Seok-Cheol Hong

E-mail: [hongsc@korea.ac.kr](mailto:hongsc@korea.ac.kr)

#### Table of Contents

|                                                                                           |           |
|-------------------------------------------------------------------------------------------|-----------|
| <i>PREPARATION OF ENZYMATIC HEMI-METHYLATED (HM) MOLECULES.....</i>                       | <i>2</i>  |
| <i>FIGURE S1 EFFECT OF [DMSO] ON DNA METHYLATION BY M.SSSI.....</i>                       | <i>3</i>  |
| <i>FIGURE S2 Z-DNA FORMATION BY ENZYMATICALLY HEMI-METHYLATED DNA .....</i>               | <i>4</i>  |
| <i>FIGURE S3 E<sub>FRET</sub> HISTOGRAMS OF QM AND TM CORES.....</i>                      | <i>5</i>  |
| <i>FIGURE S4 METHYLATION TIME OF UM CORES BY M.SSSI .....</i>                             | <i>6</i>  |
| <i>FIGURE S5 E<sub>FRET</sub> HISTOGRAMS OF UM AND HM CORES TREATED WITH DMT .....</i>    | <i>7</i>  |
| <i>FIGURE S6 INEFFICIENT DE NOVO METHYLATION OF UM CORES BY DNMT1. ....</i>               | <i>8</i>  |
| <i>FIGURE S7 E<sub>FRET</sub> HISTOGRAMS SHOWING DMT INHIBITION BY NATURAL DRUGS.....</i> | <i>10</i> |
| <i>FIGURE S8 DOI OF M.SSSI BY EGCG WITH LOW [SAM] .....</i>                               | <i>11</i> |
| <i>TABLE S1 SEQUENCE OF OLIGONUCLEOTIDES .....</i>                                        | <i>12</i> |

### **Preparation of enzymatic hemi-methylated (HM) molecules.**

First, we hybridize Cy5-labeled CG2 and unlabeled CG1 oligonucleotide strands and methylate cytosines within CG repeats in both strands with M.SssI. Then, it is heated to  $> 90^{\circ}\text{C}$ , mixed with  $\sim 10\ \mu\text{M}$  excess Cy3-labeled CG1 strand to outcompete with unlabeled CG1, and cooled down to room temperature. Now most of Cy5-labeled (methylated) CG2 is hybridized with Cy3-labeled CG1. In fact, Cy5-only Core molecules are not an issue because we only collect data from both Cy3- and Cy5-labeled DNA molecules. Full-methylated DNA molecules can be also obtained by direct methylation of FRET-pair-labeled duplex with M.SssI.

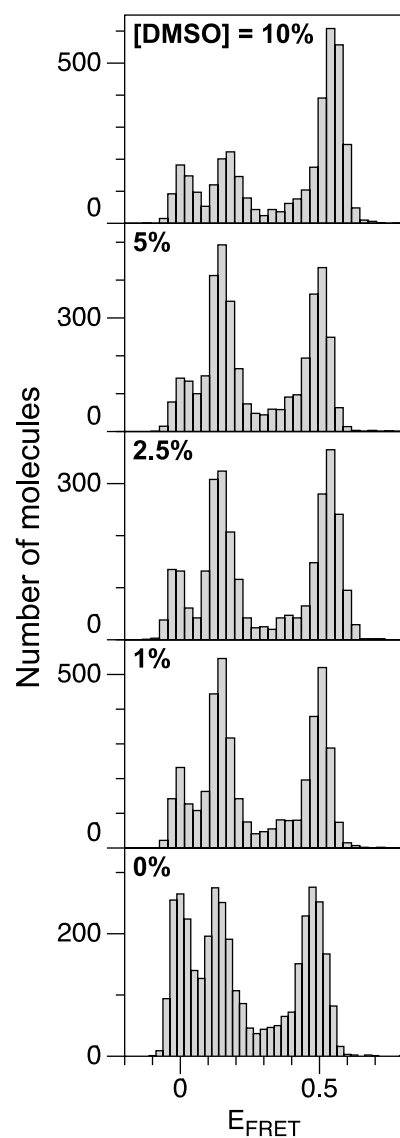

**Figure S1 Effect of [DMSO] on DNA methylation by M.SssI.**

For  $[\text{DMSO}] \leq 5\%$ , the methylation activity of M.SssI remains unchanged. In the assay, we used  $[\text{M.SssI}] = 80 \text{ U/ml}$  and performed FRET measurements in the presence of  $50 \text{ mM Mg}^{2+}$ .

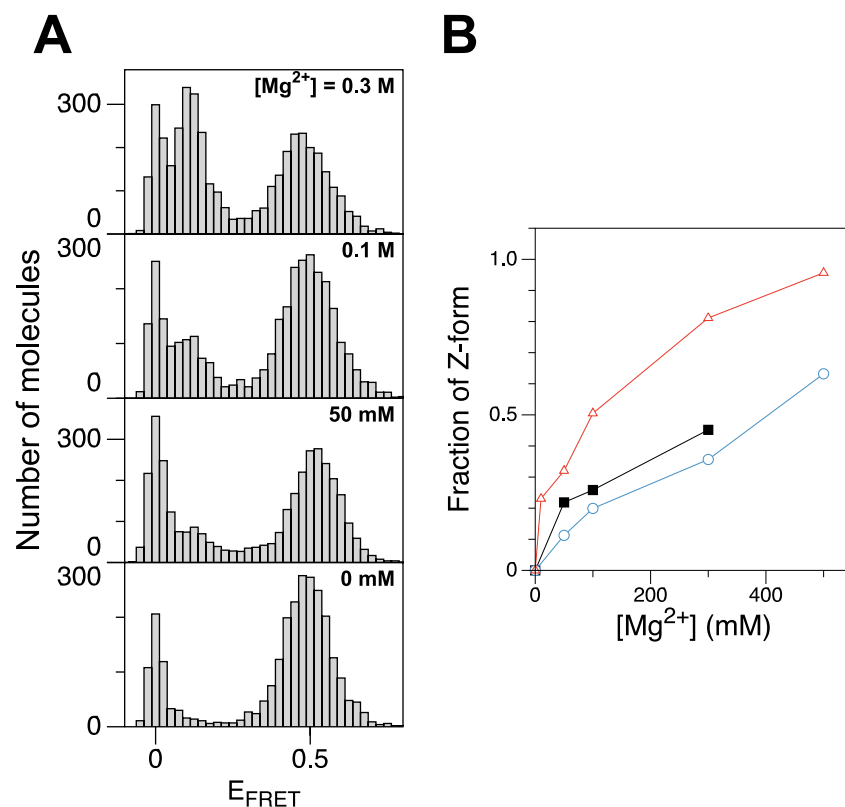

**Figure S2 Z-DNA formation by enzymatically hemi-methylated DNA**

- (A) FRET efficiency histograms for the DNA Core 'hemi-methylated' in the enzymatic manner (see main and SI text; bottom to top: no  $\text{Mg}^{2+}$  (100 mM  $\text{Na}^+$  only), 50 mM, 100 mM, 300 mM  $\text{Mg}^{2+}$ ).
- (B) Fraction of Z-form vs.  $[\text{Mg}^{2+}]$  for DNA molecules with various conditions of cytosine methylation (black square: enzymatic hemi-methylation; blue circle: QM; red triangle: HM)

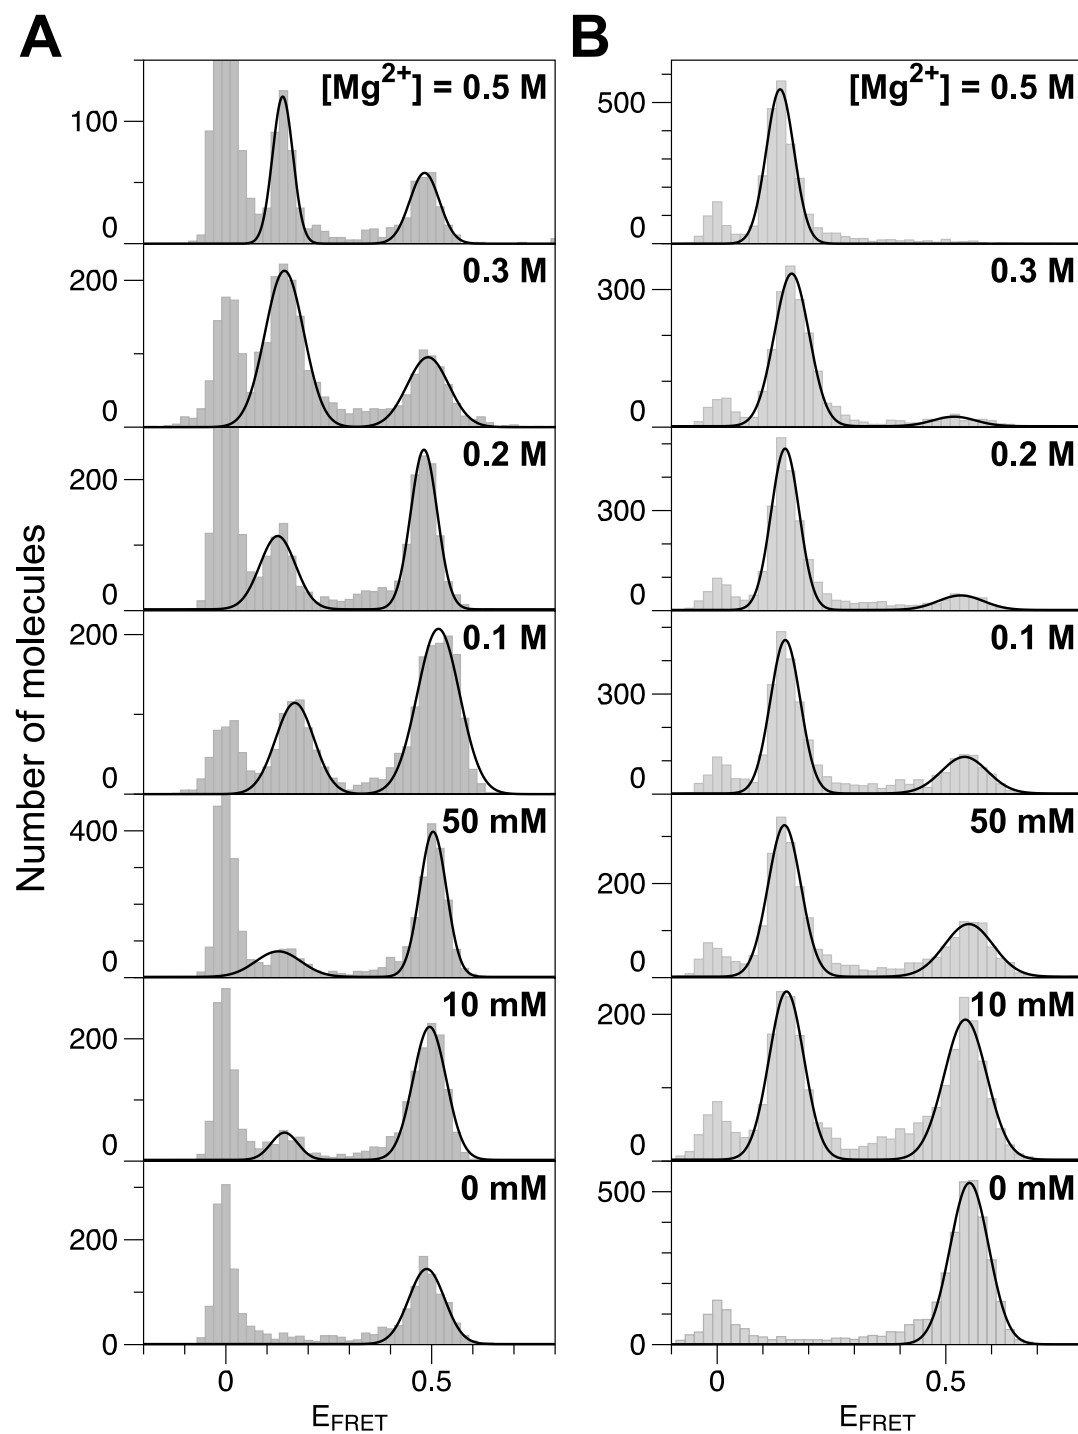

**Figure S3  $E_{\text{FRET}}$  histograms of QM and TM Cores.**

- (A) FRET efficiency histograms for a CG Core with 5 methylated cytosines on one strand (QM) (bottom to top: no  $\text{Mg}^{2+}$  (50 mM  $\text{Na}^+$  only), 10 mM, 50 mM, 100 mM, 200 mM, 300 mM, 500 mM  $\text{Mg}^{2+}$ )
- (B) FRET efficiency histograms for a CG Core with 16 methylated cytosines (TM) (11 methylated cytosines on one strand and 5 methylated cytosines on the opposite strand) (bottom to top: no  $\text{Mg}^{2+}$  (50 mM  $\text{Na}^+$  only), 10 mM, 50 mM, 100 mM, 200 mM, 300 mM, 500 mM  $\text{Mg}^{2+}$ )

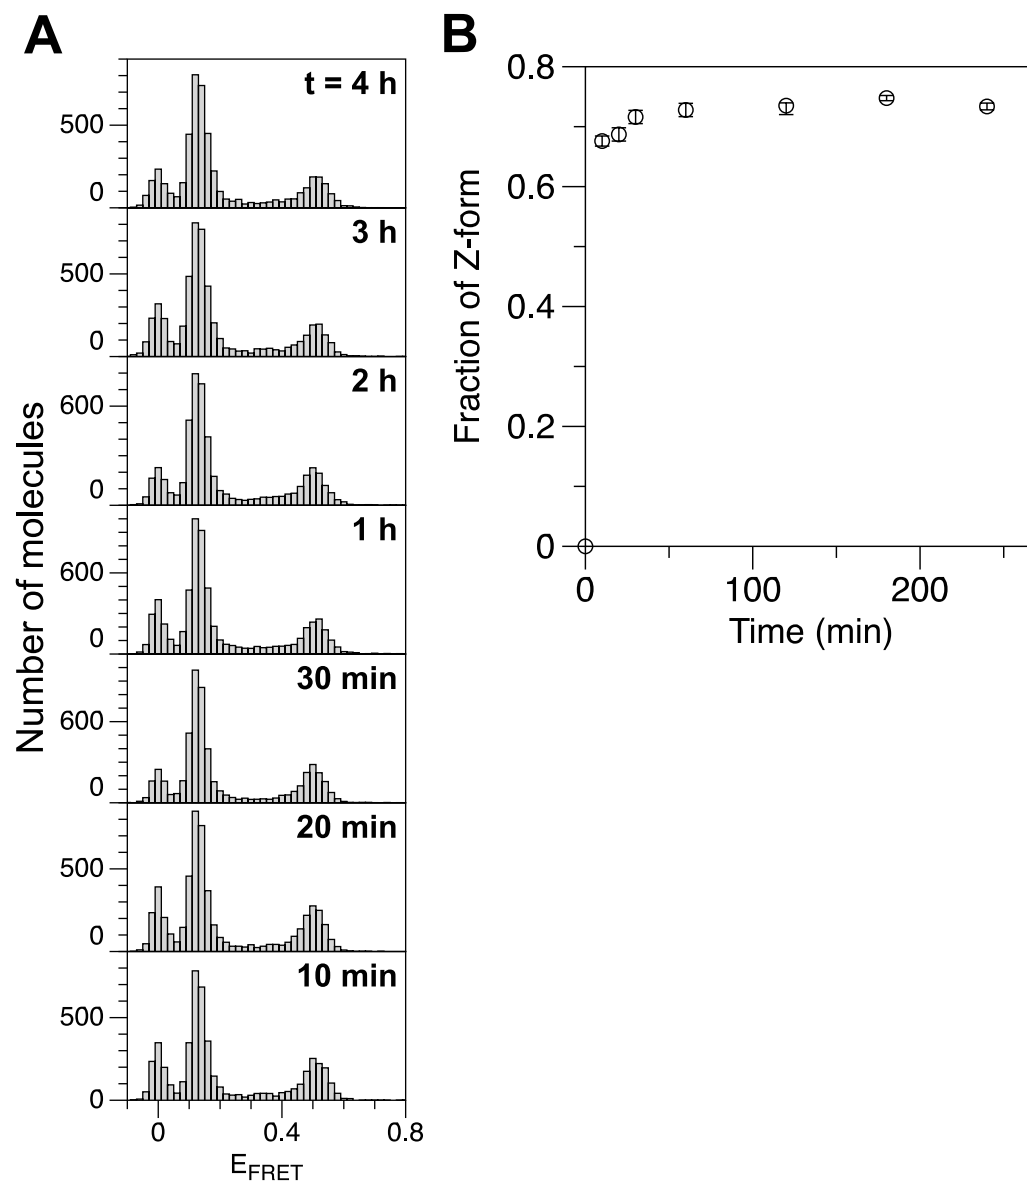

**Figure S4 Methylation time of UM Cores by M.SssI**

(A) FRET efficiency histograms from UM Cores for different methylation times by M.SssI (80 U/ml) in the presence of 50 mM  $\text{Mg}^{2+}$ .

(B) Fraction of Z-form as a function of methylation time by M.SssI.

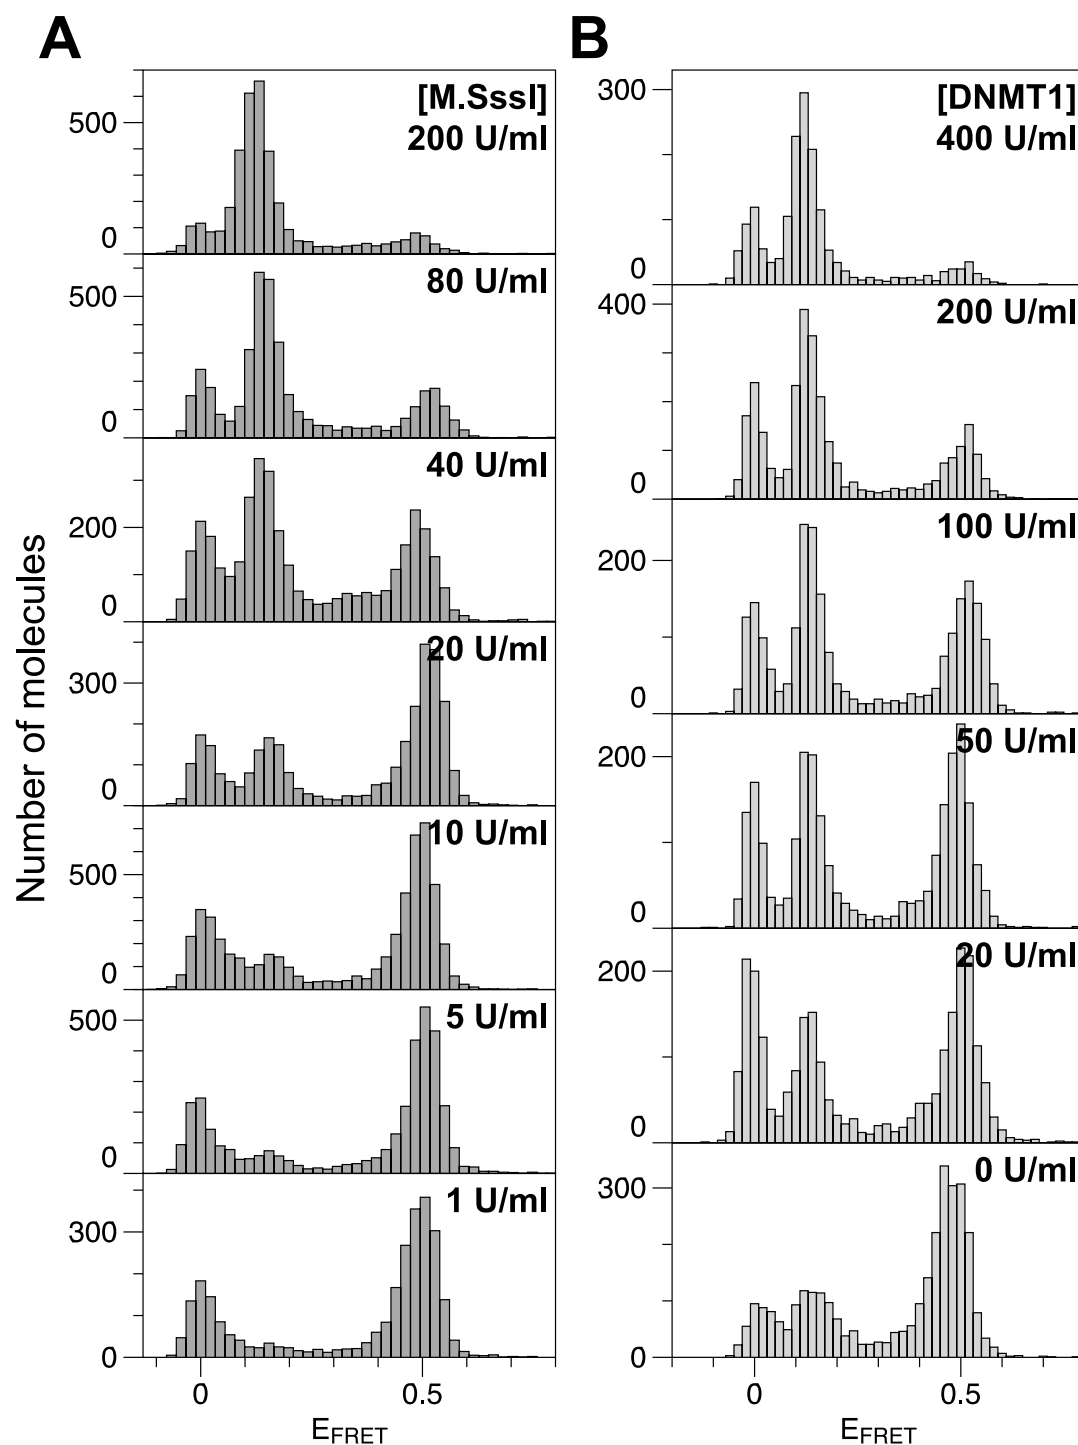

**Figure S5  $E_{\text{FRET}}$  histograms of UM and HM Cores treated with DMT**

FRET efficiency histograms of initially UM or HM Cores after 2-hour incubation with various concentrations of M.SssI (1 – 200 U/ml) or DNMT1 (20 – 400 U/ml), respectively. Fractions of Z-form deduced therefrom are presented in Figure 3.

- (A) FRET efficiency histograms from UM Cores after 2-hour incubation with M.SssI at the indicated concentrations (Figure 3A).
- (B) FRET efficiency histograms from HM Cores after 2-hour incubation with DNMT1 at the indicated concentrations (Figure 3B). No-DNMT1 control from HM is shown at the bottom.

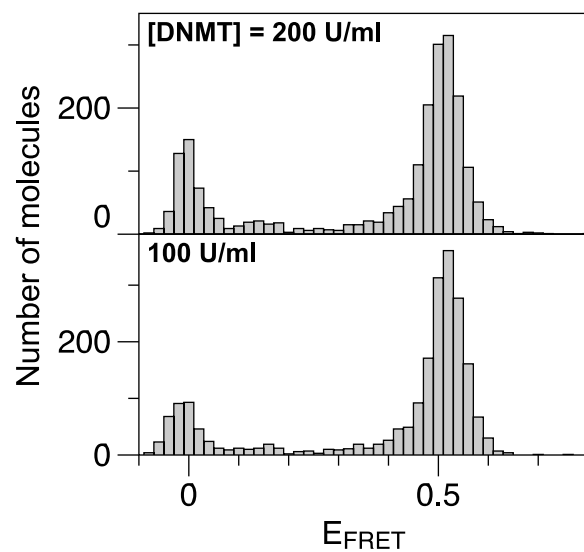

**Figure S6 Inefficient *de novo* methylation of UM Cores by DNMT1.**

FRET efficiency histograms from UM Cores pre-incubated with DNMT1 (100 or 200 U/ml) and in the presence of 50 mM Mg<sup>2+</sup>.



**A**

**M.SssI**

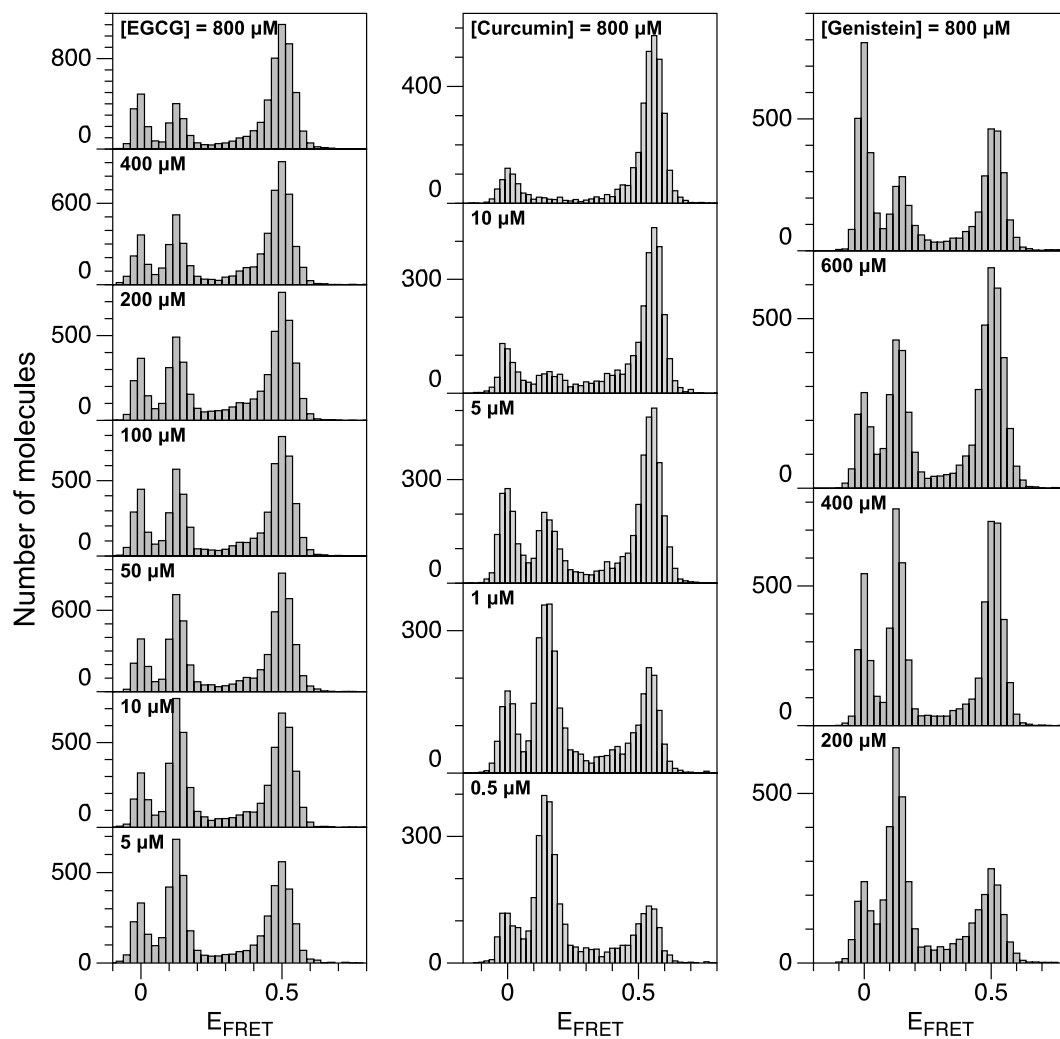

**B****DNMT1**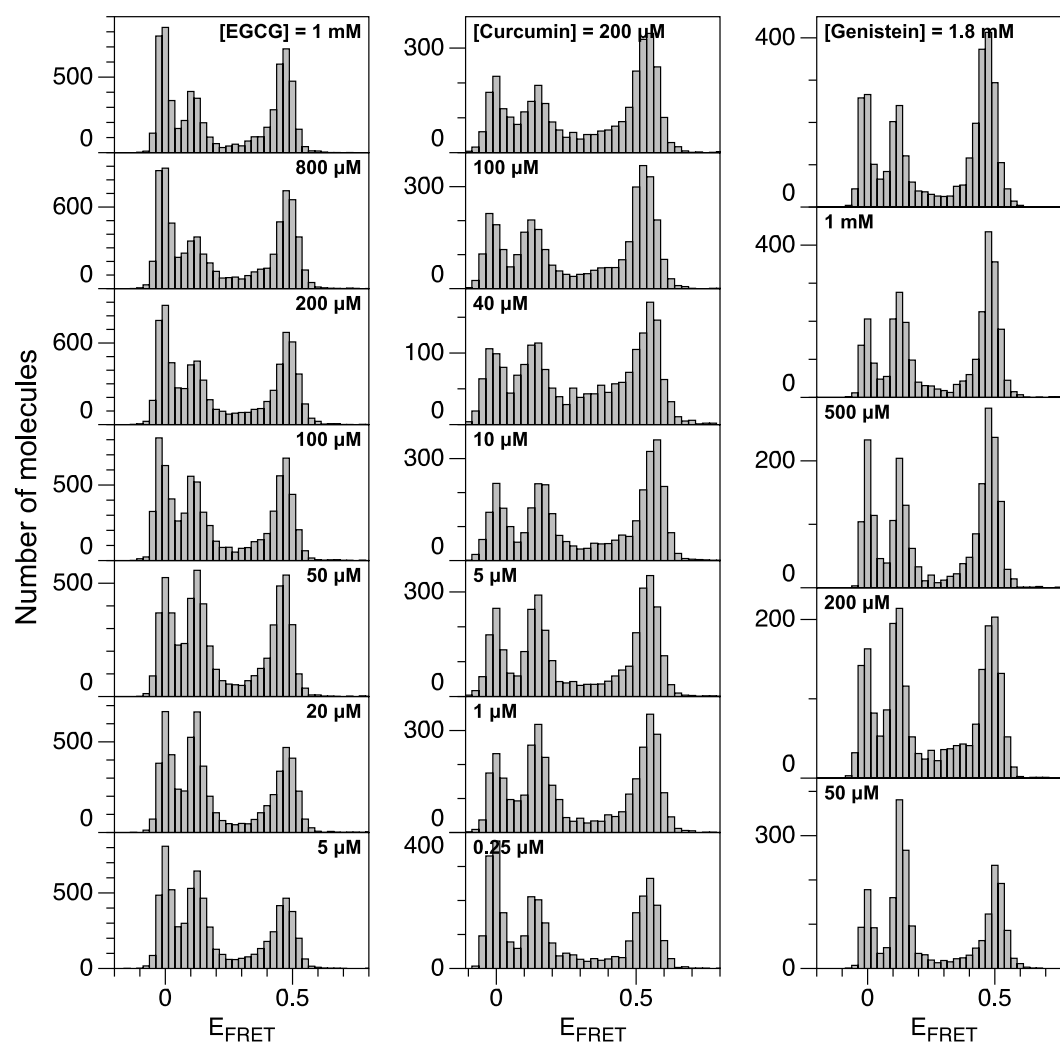

**Figure S7  $E_{\text{FRET}}$  histograms showing DMT inhibition by natural drugs.**

- (A) FRET efficiency histograms showing the inhibitory effects of the indicated natural compounds on the methylation activity of M.SssI.
- (B) FRET efficiency histograms showing the inhibitory effects of the indicated natural compounds on the methylation activity of DNMT1.

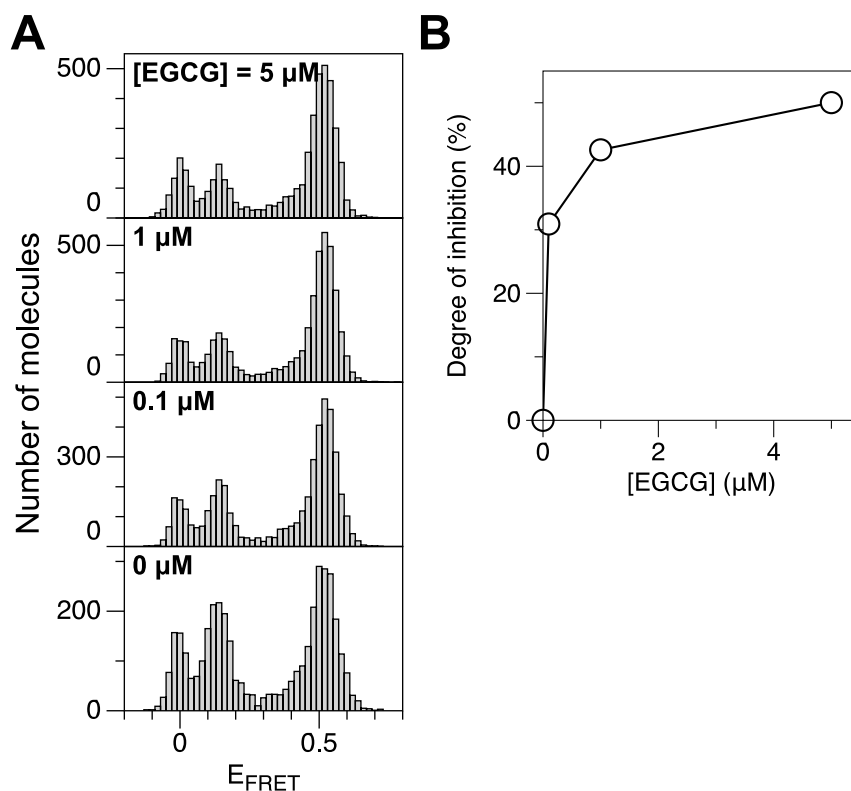

**Figure S8 DOI of M.SssI by EGCG with low [SAM]**

- (A) FRET efficiency histograms showing the inhibitory effects of EGCG at various concentrations (0, 0.1, 1, and 5  $\mu\text{M}$ ) on the methylation activity of M.SssI in the presence of [SAM] = 10  $\mu\text{M}$ .
- (B) Degree of inhibition of M.SssI activity by EGCG from (A). The  $\text{IC}_{50}$  value of EGCG in cytosine methylation by M.SssI is significantly reduced to less than 5  $\mu\text{M}$  with the reduced SAM concentration. This  $\text{IC}_{50}$  value of EGCG is in good agreement with reported  $\text{IC}_{50}$  values of EGCG obtained from similar experimental conditions (e.g. [SAM] = 10 – 20  $\mu\text{M}$ ).

**Table S1 Sequence of oligonucleotides**

Sequences of oligonucleotides used in this study. Each Core is constructed by hybridizing a pair of oligonucleotides (UM: CG1-CG2; QM: m<sup>5</sup>CG1-CG2; HM: m<sup>11</sup>CG1-CG2; TM: m<sup>5</sup>CG1-m<sup>11</sup>CG2; FM: m<sup>11</sup>CG1-m<sup>11</sup>CG2). UM, QM, and HM Cores are tethered by themselves by a biotin at 3' end of CG2(Bio) while TM and FM Cores are attached to the substrate via a biotin-labeled PCR fragment ligated to each Core. The PCR fragment is biotinylated by a PCR reaction containing biotin-dUTP, which is followed by BamHI digestion. Here, the sequence of scrambled DNA Core is also shown. iCy3 and iCy5 indicate internally labeled Cy3 and Cy5 dyes, respectively. 5'-Phos indicates the phosphate group at 5' end for ligation. The Core molecules used in this study are annotated as follows: bold, Core sequence; blue, cohesive overhang; underlined C, methylcytosine.

| Name                | Sequence                                                                                                                             |
|---------------------|--------------------------------------------------------------------------------------------------------------------------------------|
| CG1                 | 5'-Phos- <b>GAT</b> CCT GGT ACG <b>CGC GCG CGC GCG CGC</b> G(iCy5) <b>CG</b> CGA TCG AC-3'                                           |
| CG2                 | 5'-GTC GAT <b>CGC GCG CGC GCG CGC GCG</b> (iCy3) <b>CGC</b> GTA CCA GGA TC(Bio)-3'                                                   |
| m <sup>5</sup> CG1  | 5'-Phos- <b>GAT</b> CCT GGT ACG <u>CGC</u> <u>GCG</u> <u>CGC</u> <u>GCG</u> <u>CGC</u> G(iCy5) <b>CG</b> <u>CGA</u> TCG AC-3'        |
| m <sup>11</sup> CG1 | 5'-Phos- <b>GAT</b> CCT GGT <u>ACG</u> <u>CGC</u> <u>GCG</u> <u>CGC</u> <u>GCG</u> <u>CGC</u> G(iCy5) <b>CG</b> <u>CGA</u> TCG AC-3' |
| m <sup>11</sup> CG2 | 5'-Phos-TGC CGT CGA <u>TGC</u> <u>CGC</u> <u>GCG</u> <u>CGC</u> <u>GCG</u> <u>CGC</u> G(iCy3) <b>CG</b> <u>CGT</u> ACC AG-3'         |
| Scramble1           | 5'-Phos- <b>GAT</b> CCT GGT AGC TGC TCA GAC TCG TCA G(iCy5)CA TCA TCG AC-3'                                                          |
| Scramble2           | 5'-Phos-TGC CGT CGA TGA TGC TGA CGA GTC TGA G(iCy3)CA GCT ACC AG-3'                                                                  |
